# Supplementary material for: Development of Ni-Sr(V,Ti)O3-δ Fuel Electrodes for Solid Oxide Fuel Cells
Source: MDPI journal article supplement (doi:10.3390/ma15010278), 2021-12-30
Supplement: s1 [file s1]

# Development of Ni-Sr(V,Ti)O<sub>3-δ</sub> Fuel Electrodes for Solid Oxide Fuel Cells

Bernardo F. Serôdio Costa <sup>1</sup>, Blanca I. Arias-Serrano <sup>1,2,\*</sup> and Aleksey A. Yaremchenko <sup>1,\*</sup>

<sup>1</sup> Department of Materials and Ceramic Engineering, CICECO—Aveiro Institute of Materials, University of Aveiro, 3810-193 Aveiro, Portugal; bernardo.costa.90@gmail.com

<sup>2</sup> Leibniz Institute for Plasma Science and Technology, Felix-Hausdorff-Str. 2, 17489 Greifswald, Germany

\* Correspondence: arias-serrano@inp-greifswald.de (B.I.A.-S.); ayaremchenko@ua.pt (A.A.Y.)

**Table S1.** Taguchi planning matrix for cation compositions of Sr<sub>1-α</sub>Ti<sub>1-β(1+γ)</sub>V<sub>β</sub>Ni<sub>βγ</sub>O<sub>3-δ</sub> (STVN) series.

| Level, <i>n</i> | Variable, <i>v</i> |          |          |
|-----------------|--------------------|----------|----------|
|                 | <i>α</i>           | <i>β</i> | <i>γ</i> |
| 1               | 0                  | 0.2      | 0.1      |
| 2               | 0.02               | 0.3      | 0.2      |
| 3               | 0.04               | 0.4      | 0.3      |

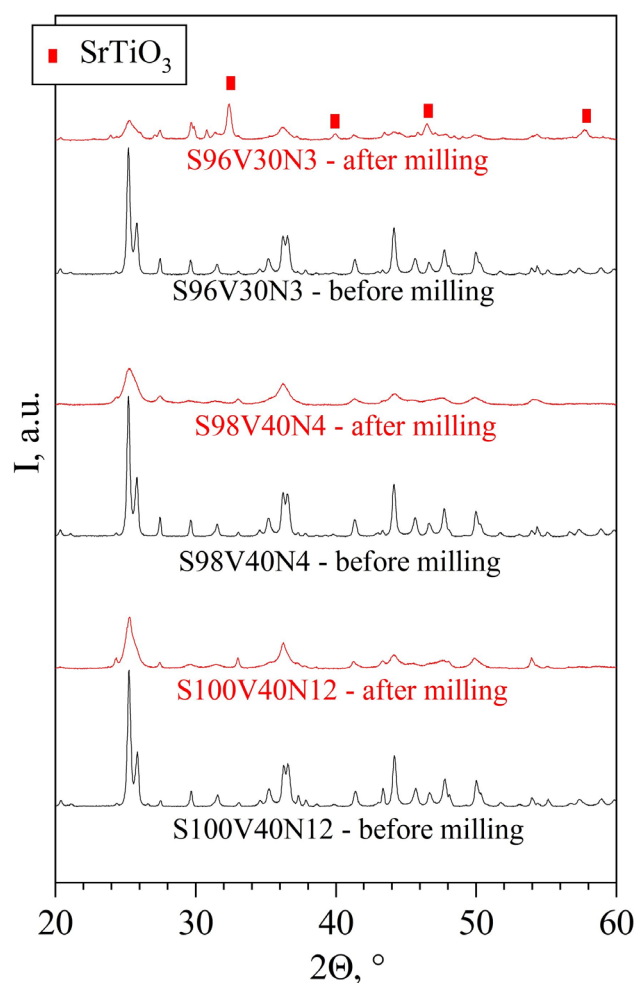

**Figure S1.** XRD patterns of selected precursor mixtures before and after the mechanical activation. An onset of target SrTiO<sub>3</sub>-based perovskite phase was observed for S96V30N3 as a result of high-energy mechanical treatment.

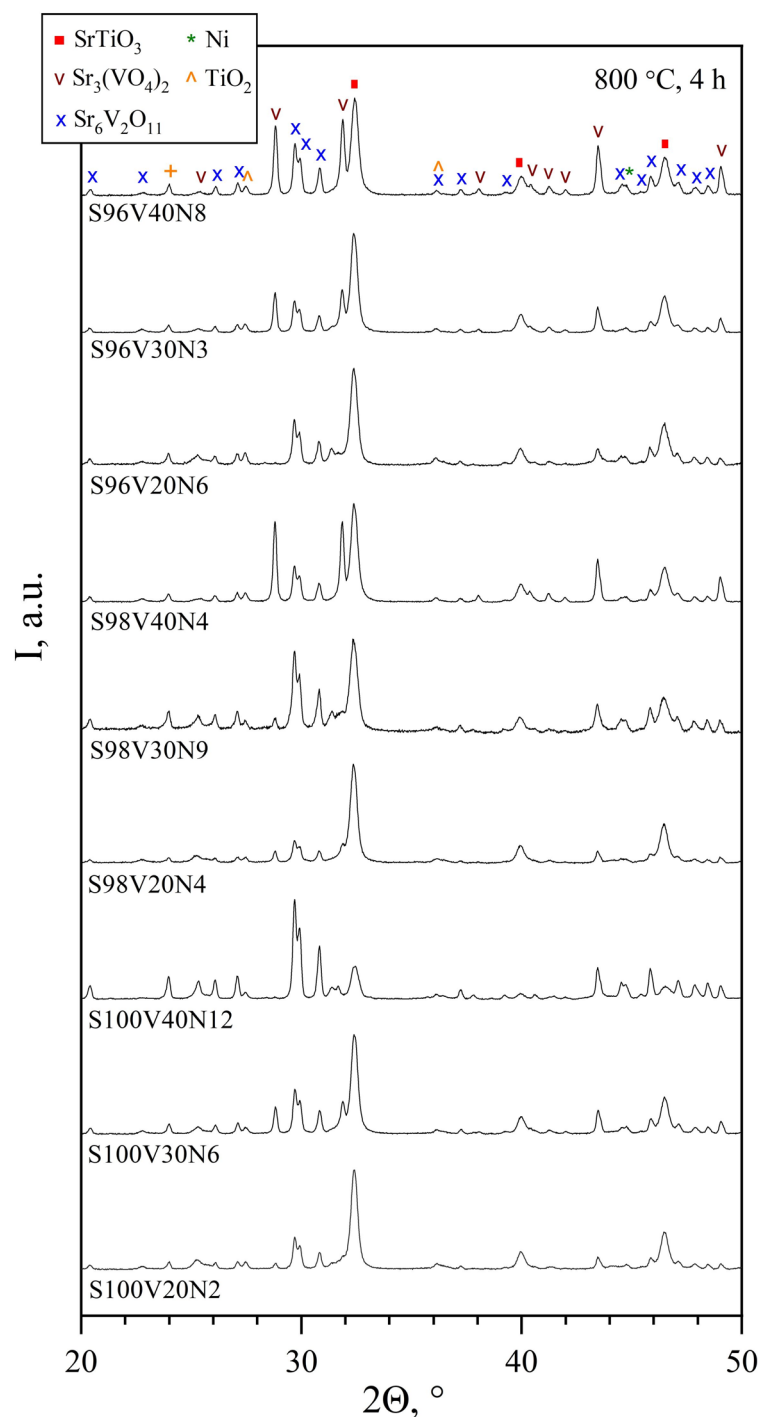

**Figure S2.** XRD patterns of SVTN samples after calcination for 4 h in flowing 10% $\text{H}_2$ - $\text{N}_2$  atmosphere at 800 °C. Phase identification is representatively shown for the S96V40N8 sample.

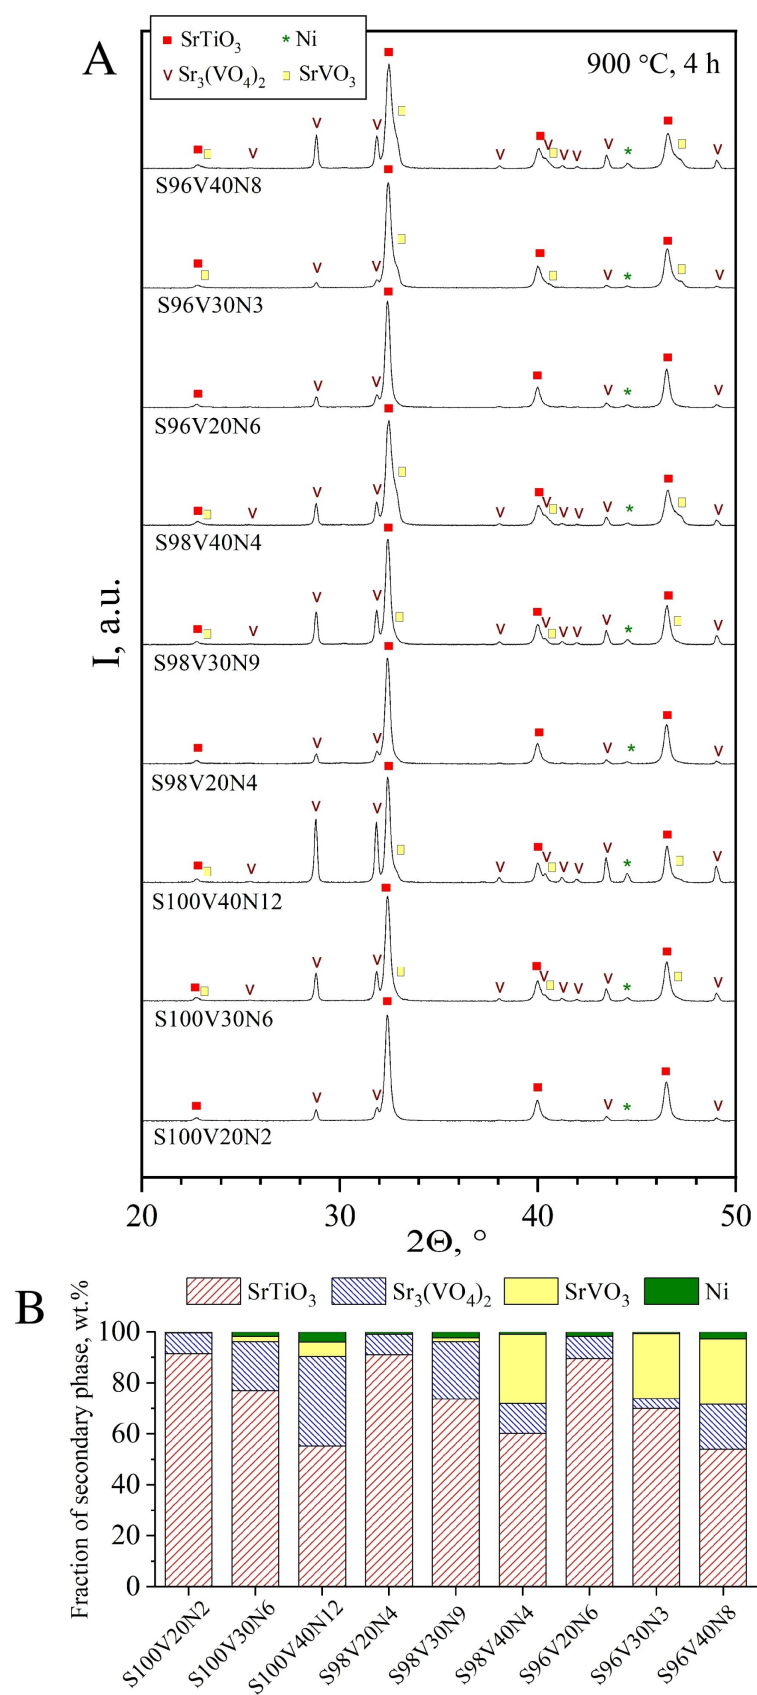

**Figure S3.** XRD patterns of SVTN samples (A) and estimated fractions of different phases (B) after calcination for 4 h in flowing 10% $\text{H}_2$ - $\text{N}_2$  at 900 °C.

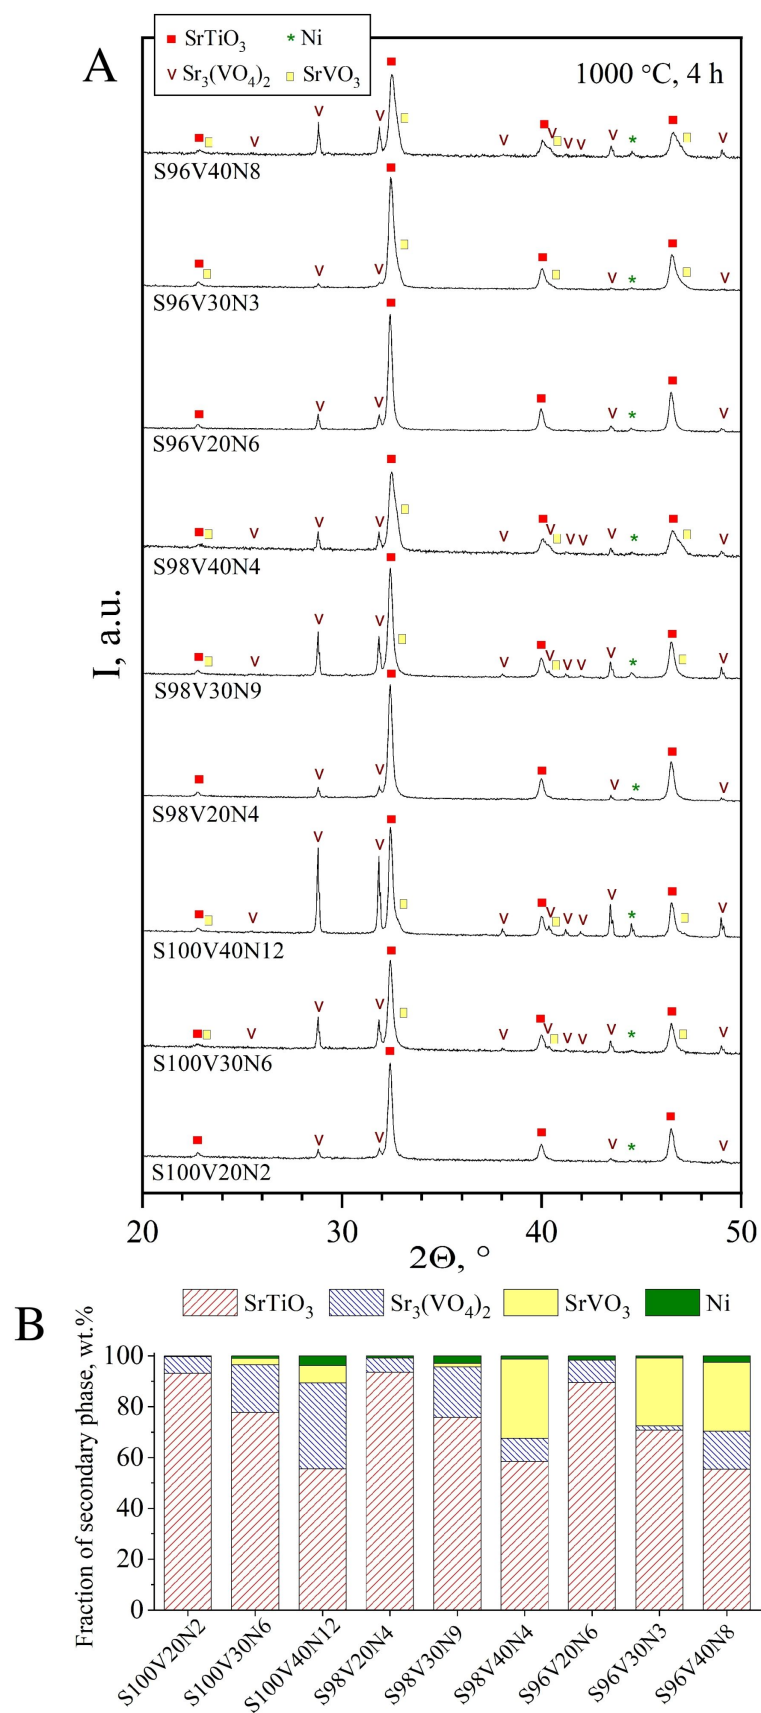

**Figure S4.** XRD patterns of SVTN samples (A) and estimated fractions of different phases (B) after calcination for 4 h in flowing 10% $\text{H}_2$ - $\text{N}_2$  at 1000 °C.



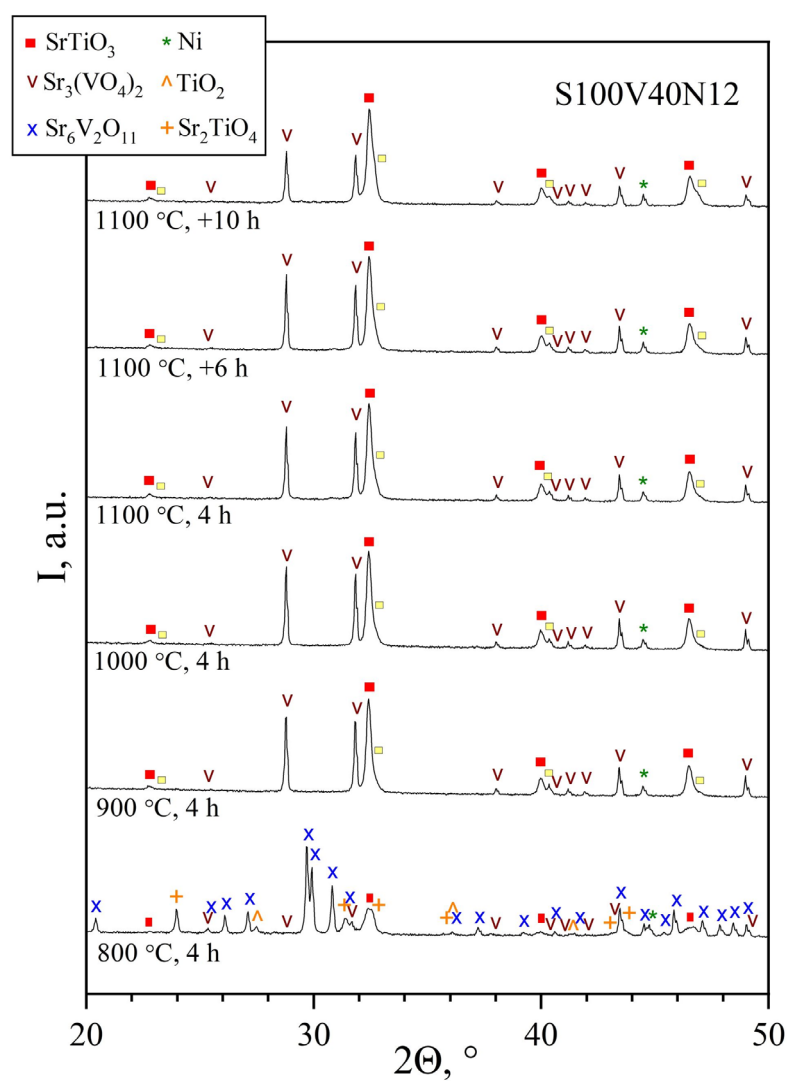

**Figure S5.** XRD patterns of SV40N12 sample after consecutive thermal treatment steps in flowing 10% $\text{H}_2$ - $\text{N}_2$  at 800-1100 °C.

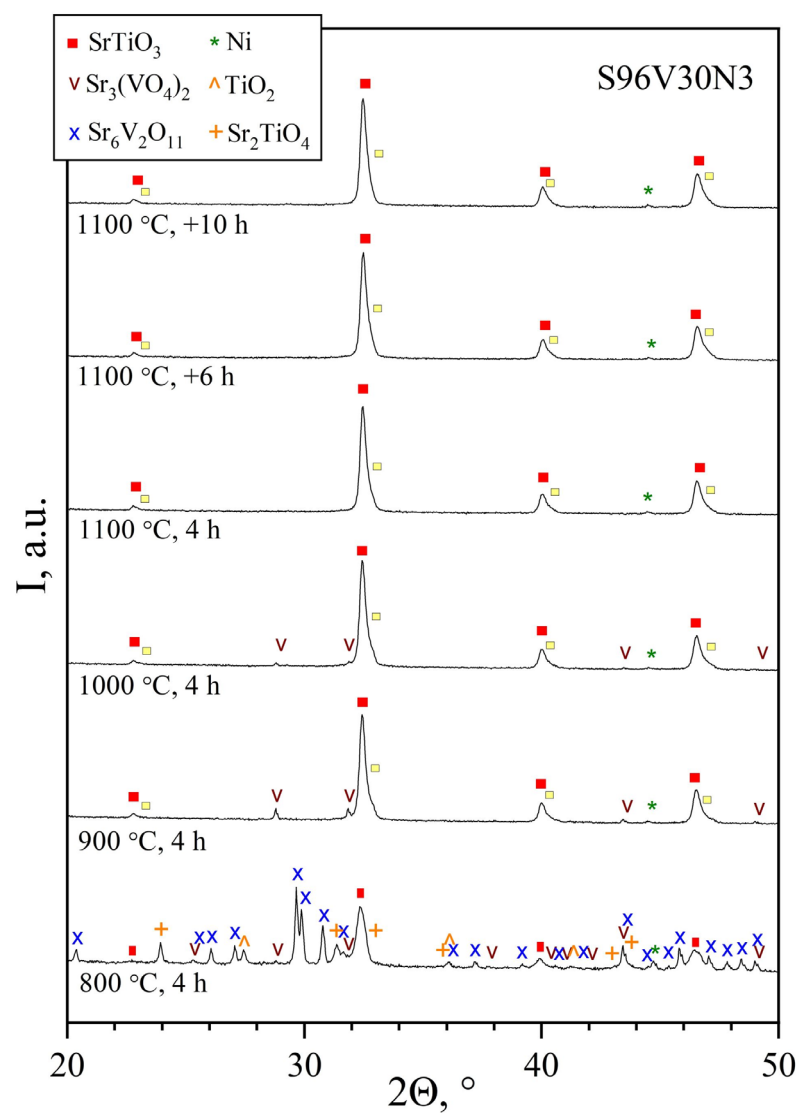

**Figure S6.** XRD patterns of S96V30N3 sample after consecutive thermal treatment steps in flowing 10% $\text{H}_2$ - $\text{N}_2$  at 800-1100 °C.

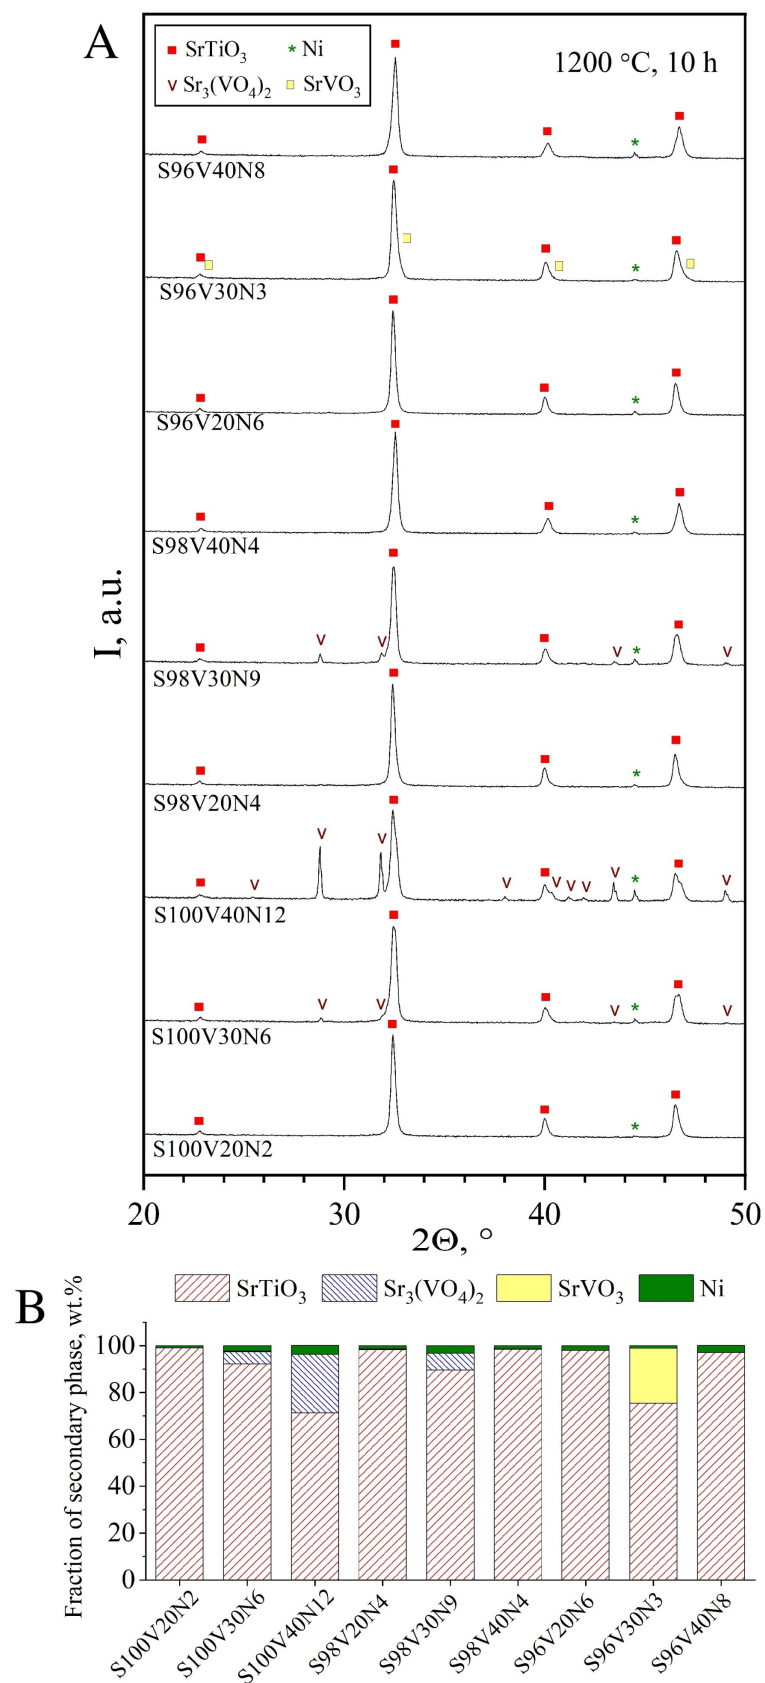

**Figure S7.** XRD patterns (**A**) and estimated fractions of different phases (**B**) in SVTN samples after firing in a flowing 10% $\text{H}_2$ - $\text{N}_2$  atmosphere at 1200 °C for 10 h.

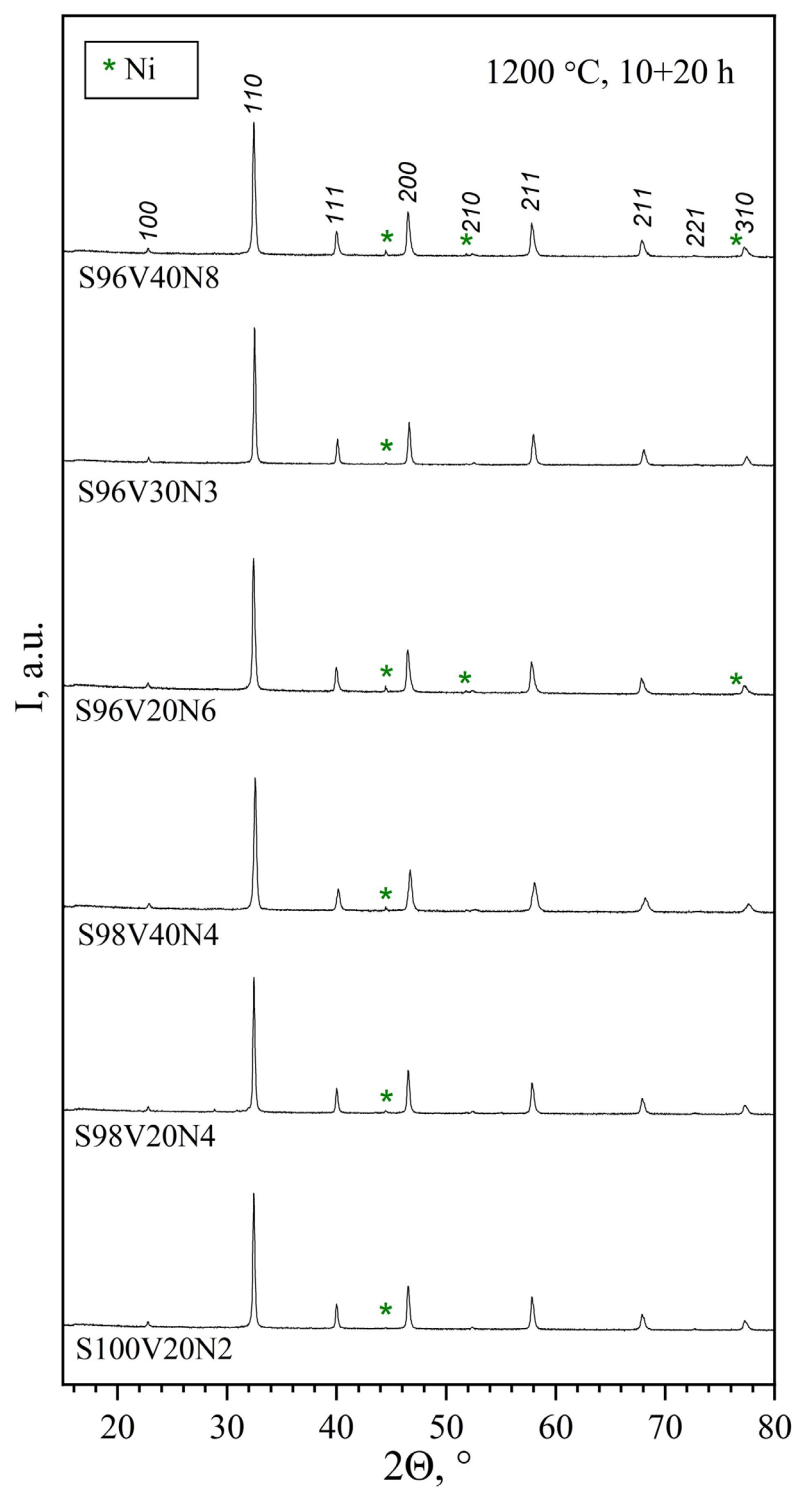

**Figure S8.** XRD patterns of STVN samples after firing in flowing 10% H<sub>2</sub>-N<sub>2</sub> atmosphere at 1200 °C for 30 h.

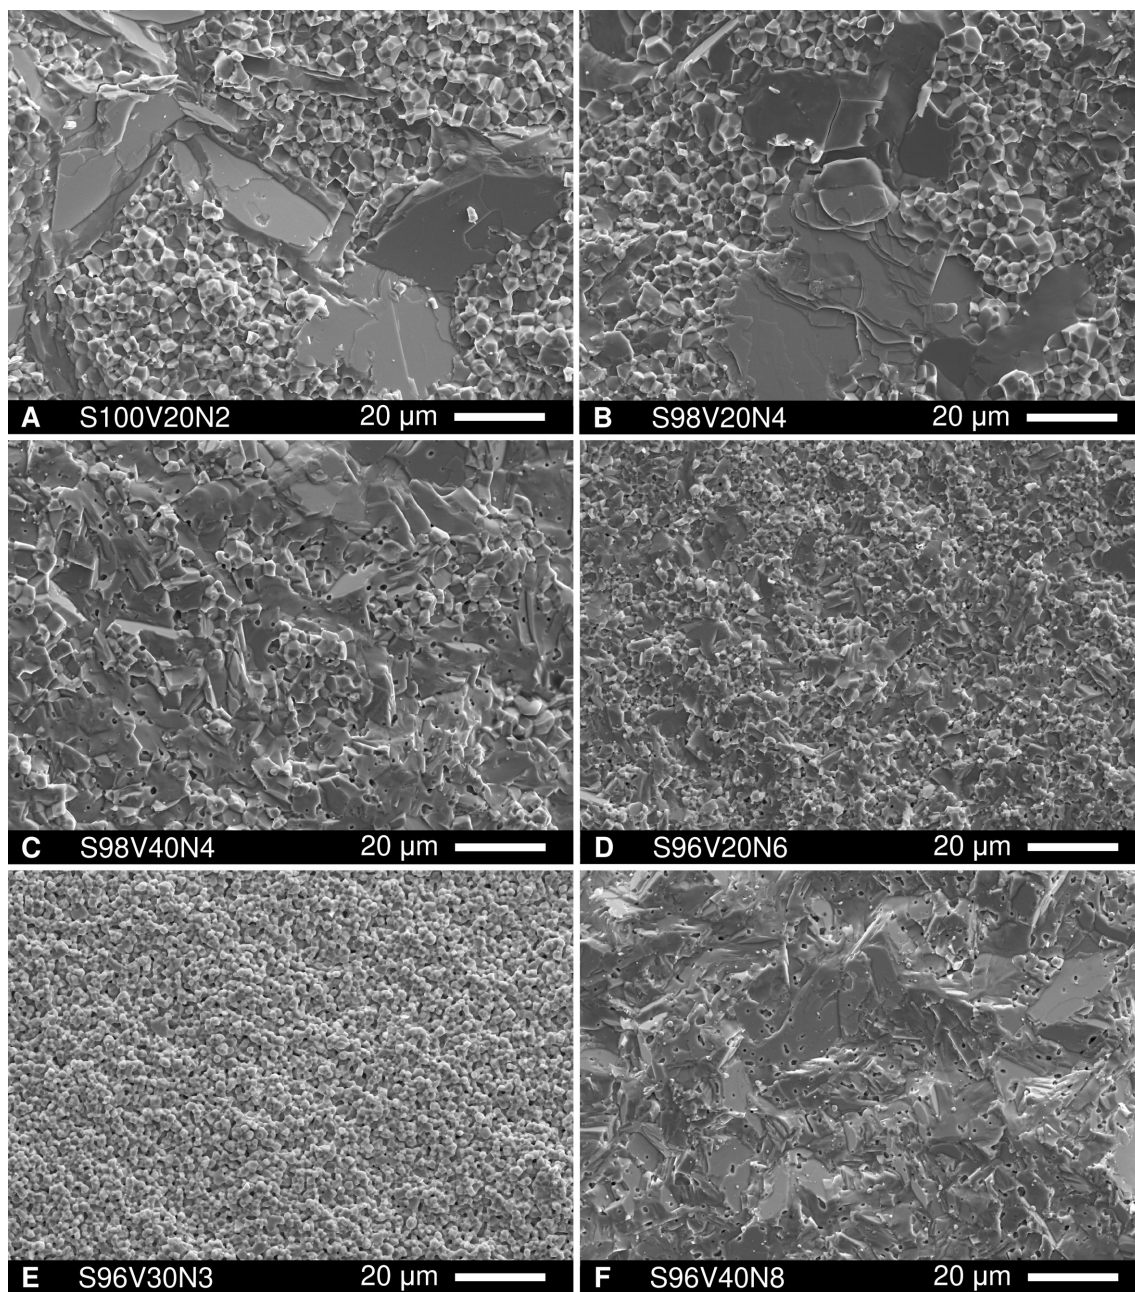

**Figure S9.** SEM micrographs of fractured cross-sections of STVN ceramics sintered at 1450 °C for 10 h in 10% $\text{H}_2$ - $\text{N}_2$  atmosphere.



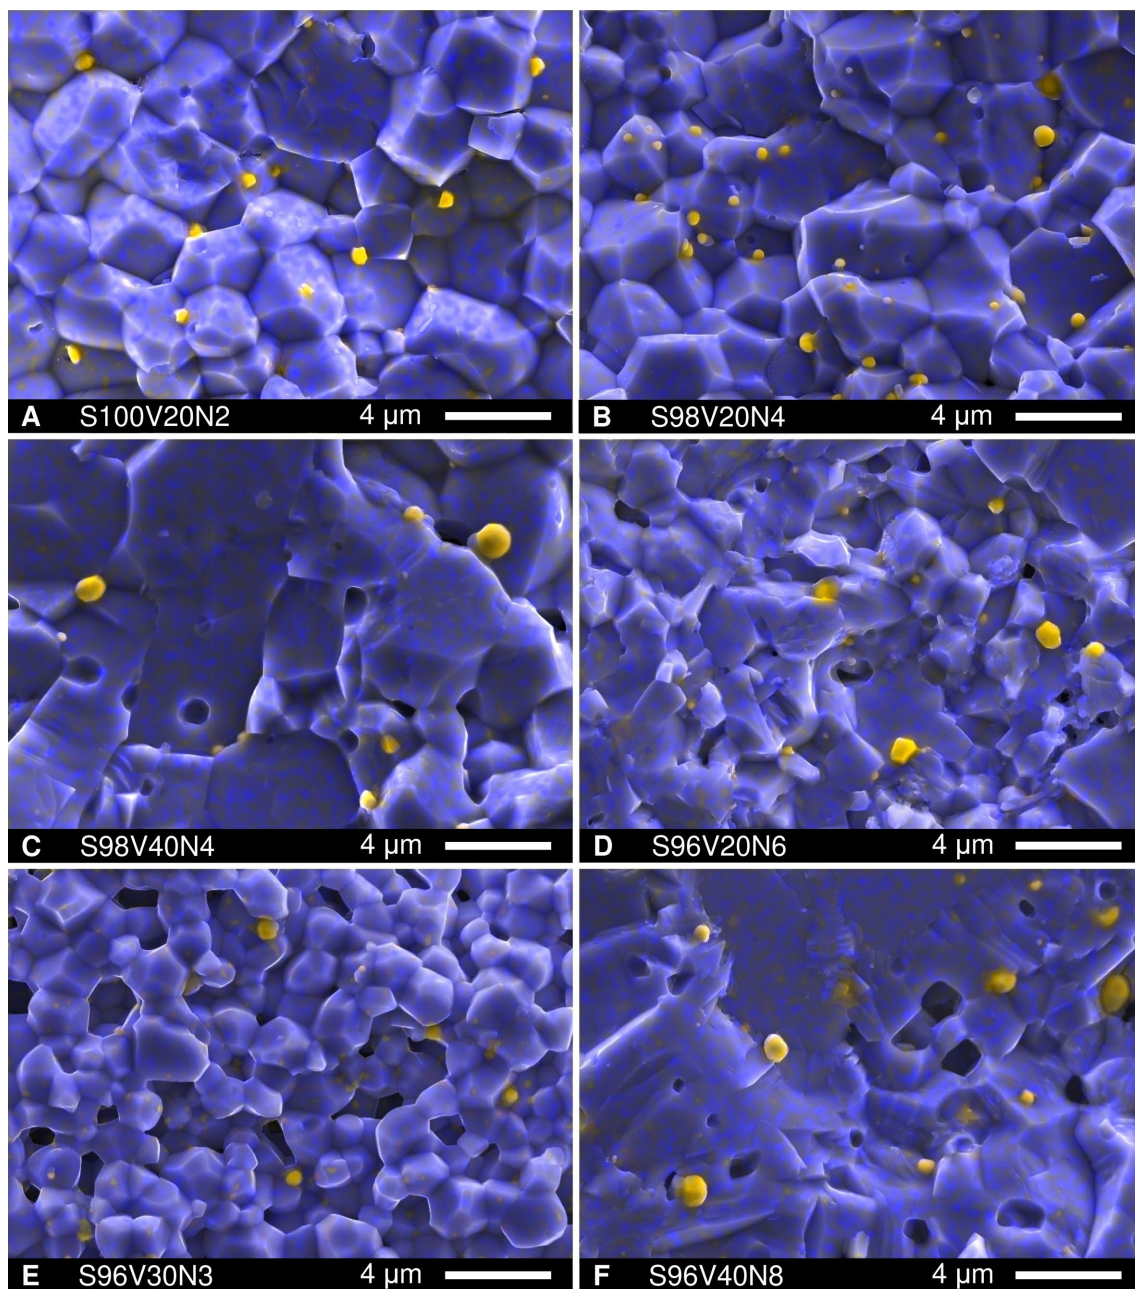

**Figure S10.** SEM micrographs of the fractured surface of STVN ceramics with overlaid EDS elemental mapping.

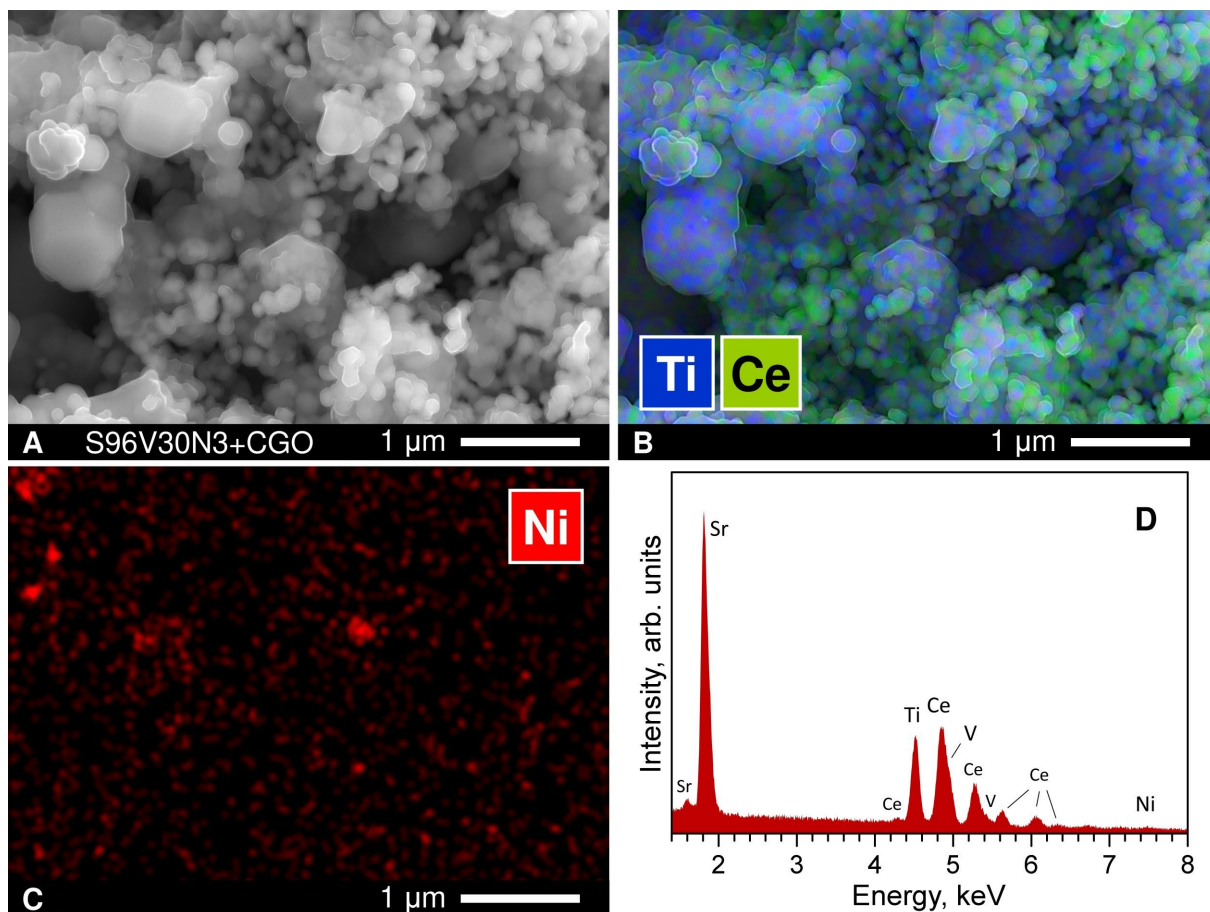

**Figure S11.** Microstructure of S96V30N3 electrode infiltrated with CGO (26 wt.%): (A) SEM image; (B) SEM image with overlaid EDS elemental mapping showing the distribution of STVN and CGO phases; (C) EDS mapping of Ni distribution; (D) corresponding EDS spectrum.

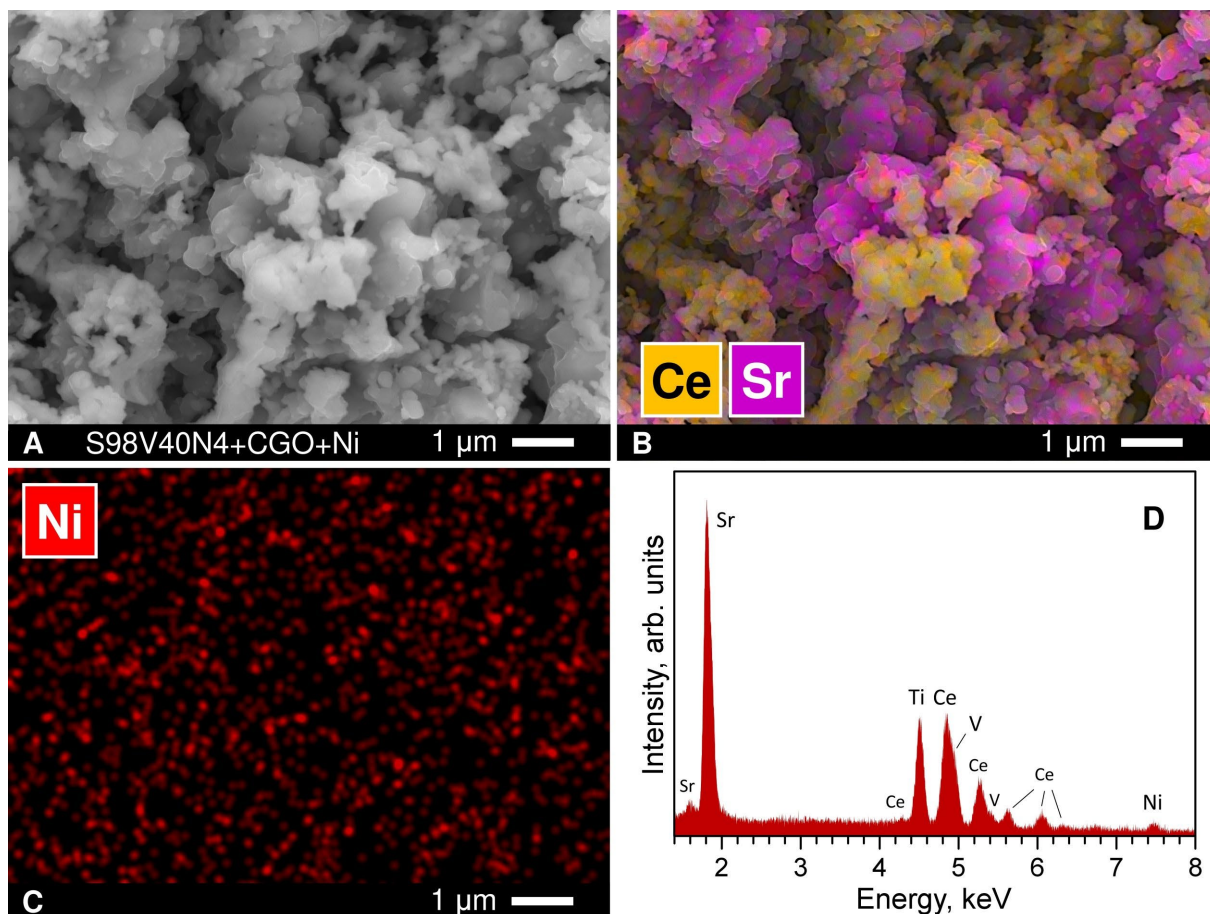

**Figure S12.** Microstructure of S98V40N4 electrode infiltrated with CGO and Ni (30 wt.%, CGO:Ni = 10:1): (A) SEM image; (B) SEM image with overlaid EDS elemental mapping showing the distribution of STVN and CGO phases; (C) EDS mapping of Ni distribution; (D) corresponding EDS spectrum.
